# Supplementary material
Source: MDPI journal article supplement (https://www.mdpi.com/2227-9717/8/1/53)
Supplement: s1 [file s1]

# Supplementary Materials

Article

## Thermal Isolation of a Clean Alloy from Waste Slag and Polymeric Residue of Electronic Waste

Rasoul Khayyam Nekouei \*, Samane Maroufi, Mohammad Assefi, Farshid Pahlevani and Veena Sahajwalla

Centre for Sustainable Materials Research and Technology (SMaRT), School of Materials Science and Engineering, University of New South Wales (UNSW), Sydney 2052, Australia; s.maroufi@unsw.edu.au (S.M.); m.assefi@unsw.edu.au (M.A.); f.pahlevani@unsw.edu.au (F.P.); veena@unsw.edu.au (V.S.)

\* Correspondence: r.nekouei@unsw.edu.au

Received: 7 November 2019; Accepted: 20 December 2019; Published: 2 January 2020

**Table S1.** The name and molecular structures of the compounds recognized at the mass spectrum illustrated in *Error! Reference source not found.*

| No. | Compound                        | Molecular structure                                                                 | No. | Compound                                            | Molecular structure                                                                   |
|-----|---------------------------------|-------------------------------------------------------------------------------------|-----|-----------------------------------------------------|---------------------------------------------------------------------------------------|
| 1   | 1-Bromo-butane                  | 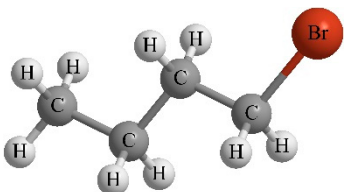  | 2   | Styrene                                             |   |
| 3   | Phenol                          |  | 4   | 2-Methyl-3,3,5-trimethylcyclohexyl-2 propenoic acid |  |
| 5   | 2-Bromo-phenol                  |  | 6   | cis-p-Mentha-2,8-dien-1-ol                          |  |
| 7   | 2,3-Dihydro-2-methyl-benzofuran |  | 8   | 2-Allylphenol                                       |  |

|    |                                           |                                                                                     |    |                                               |                                                                                      |
|----|-------------------------------------------|-------------------------------------------------------------------------------------|----|-----------------------------------------------|--------------------------------------------------------------------------------------|
| 9  | 1-phenoxy-2-propanone                     | 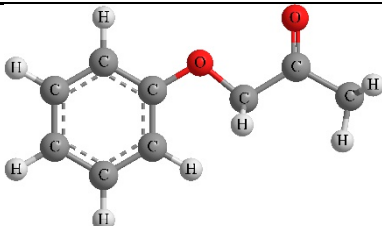   | 10 | 4-(1-methylethyl)-phenol                      |   |
| 11 | p-Isopropenylphenol                       |    | 12 | 3,4-Dihydro-2H-1-benzopyran-3-ol              |   |
| 13 | 2,4-Dibromophenol                         |    | 14 | 2-Bromo-p-cymene                              |   |
| 15 | 2,3-Dihydro-2,2,4,6-tetramethylbenzofuran |   | 16 | 1,2,3,4-Tetrahydro-2,5,8-trimethylnaphthalene |  |
| 17 | p-hydroxybiphenyl                         |  |    |                                               |                                                                                      |
